# Supplementary material
Source: publisher figshare collection journal article supplement (https://acs.figshare.com/ndownloader/files/17844596)
Supplement: Supplementary file 1 [file 17844596]

# Supporting Information: Quantitative Structural Characterization of Catalytically Active TiO<sub>2</sub> Nanoparticles

Soham Banerjee,<sup>†</sup> Amirali Zangiabadi,<sup>†</sup> Akbar Mahdavi-Shakib,<sup>‡</sup> Samra  
Husremovic,<sup>¶</sup> Brian G. Frederick,<sup>‡</sup> Katayun Barmak,<sup>†</sup> Rachel Narehood Austin,<sup>¶</sup>  
and Simon J. L. Billinge<sup>\*,§</sup>

<sup>†</sup>*Department of Applied Physics and Applied Mathematics, Columbia University, New  
York, NY 10027*

<sup>‡</sup>*Department of Chemistry, University of Maine, Orono, ME 04469*

<sup>¶</sup>*Department of Chemistry, Barnard College, Columbia University, New York, NY 10027*

<sup>§</sup>*Department of Applied Physics and Applied Mathematics, Columbia University, New  
York, NY 10027*

*Condensed Matter Physics and Materials Science Department, Brookhaven National  
Laboratory, Upton, NY 11973*

E-mail: sb2896@columbia.edu

## Single phase refinements of TiO<sub>2</sub> supports

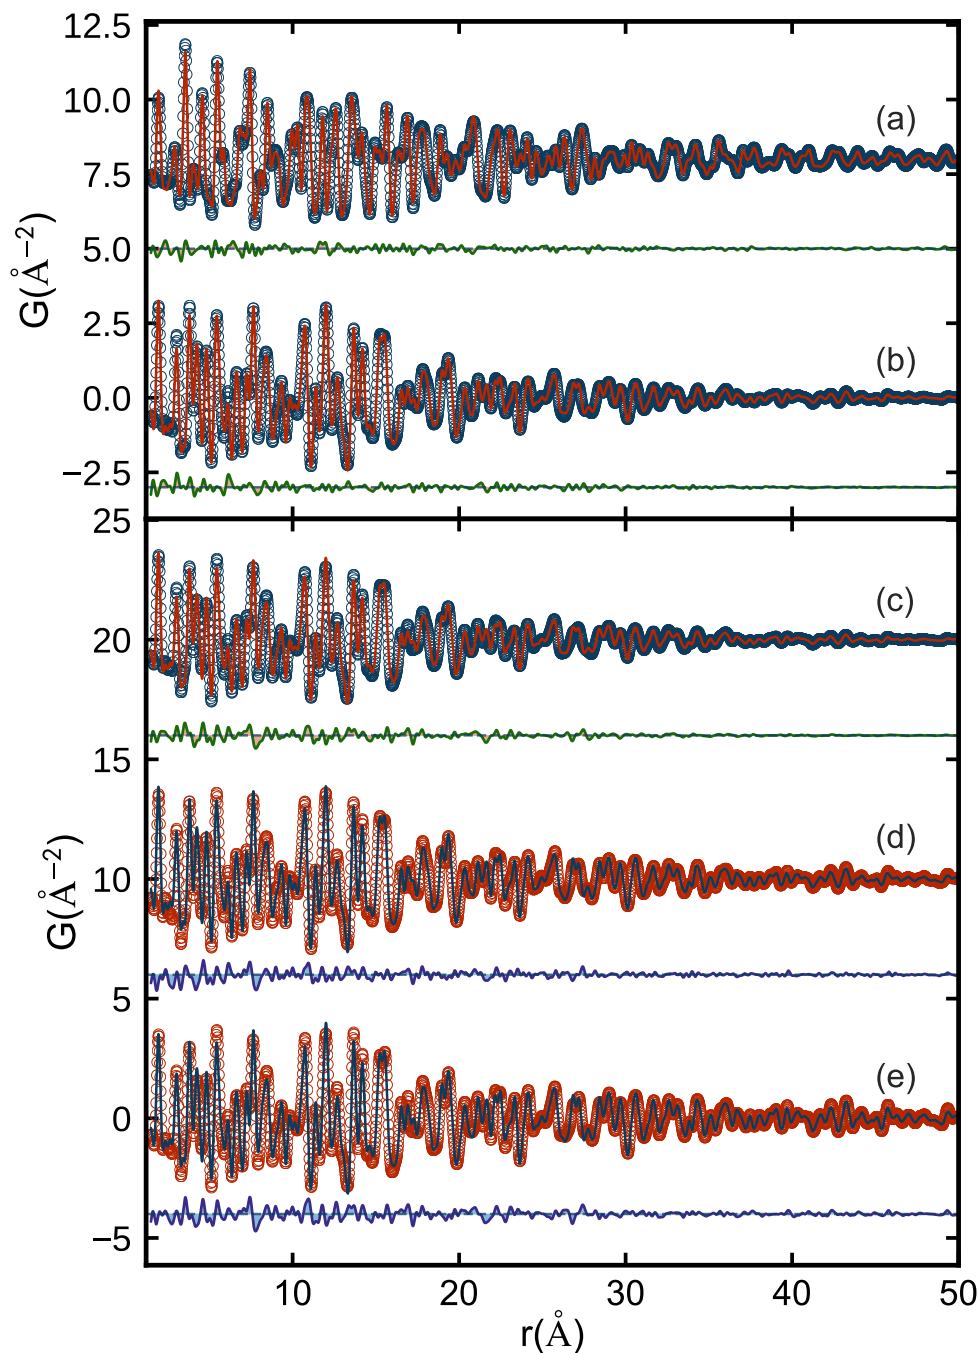

Fig. S1: Measured (open symbols) and calculated (solid lines) PDFs of pure rutile (a) pure anatase (b) a physical mixture of 90% anatase and 10% rutile (c) P90 (d) and P25 (e). The experimental PDF for rutile (a) is fit with a single phase rutile model while the phase pure and majority anatase PDFs (b-e) are fit with a single phase anatase model. Difference curves are offset below.

Table S1: Refined parameters from single phase refinements of pure (columns 1-2) and mixed (columns 3-5)  $\text{TiO}_2$  samples using a single phase anatase model for the mixed nanomaterials, which are expected to contain a majority Anatase phase. See the main text for descriptions of the abbreviations below. Structure models were obtained from published crystal structures of bulk anatase and rutile.<sup>1,2</sup> For rutile (SG:  $\text{P4}_2/\text{mnm}$ ), O is at the  $2a$  (0,0,0) site and Ti at  $4f$  (0.306,0.306,0). In anatase (SG:  $\text{I4}_1/\text{amd}$ ), O is positioned at  $4a$  (0,0,0) and Ti at  $8e$  (0,0,0.208).

| Sample                         | Anatase | Rutile | Mix <sub>90:10</sub> | P90   | P25    |
|--------------------------------|---------|--------|----------------------|-------|--------|
| $a = b$ (Å)                    | 3.785   | 4.592  | 3.783                | 3.785 | 3.785  |
| $c$ (Å)                        | 9.504   | 2.958  | 9.498                | 9.487 | 9.492  |
| Ti $U_{iso}$ (Å <sup>2</sup> ) | 0.006   | 0.006  | 0.007                | 0.005 | 0.005  |
| O $U_{iso}$ (Å <sup>2</sup> )  | 0.016   | 0.016  | 0.017                | 0.015 | 0.014  |
| SPD (Å)                        | 69.78   | 152.4  | 68.66                | 93.27 | 161.06 |
| $R_w$                          | 0.104   | 0.109  | 0.155                | 0.163 | 0.181  |

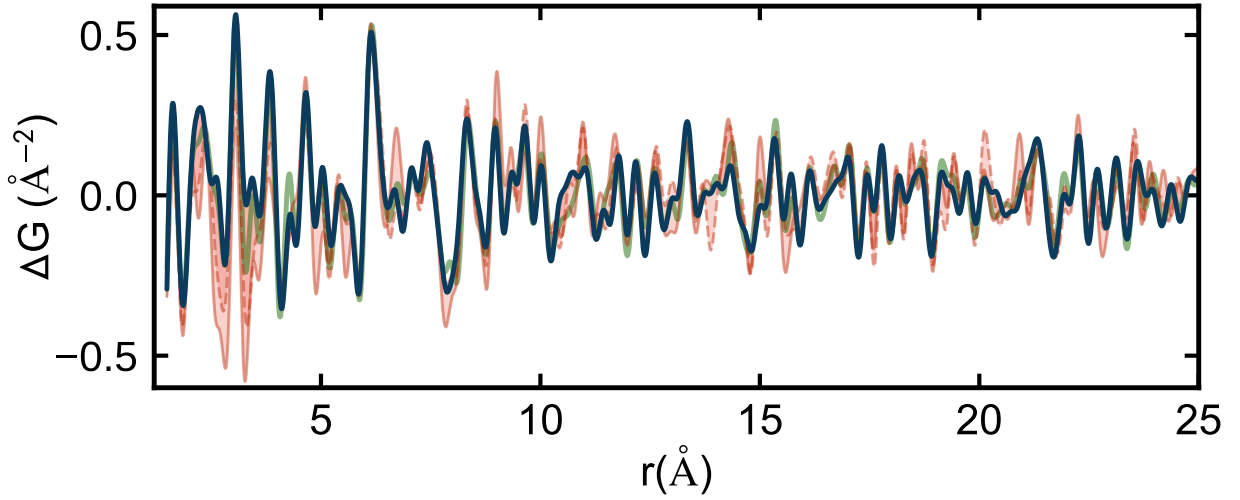

Fig. S2: Dark blue: unfit signal from a single phase refinement of pure anatase. Green: unfit signal from mixed phase refinement of the physical mixture. Red and dashed red: unfit signal from mixed phase refinement of P90 and P25, respectively. The pearson correlation coefficients between all mixed phase  $\text{TiO}_2$  residuals and the pure anatase residual are  $> 0.75$  for an  $r$ -range between  $1.2 < r < 30$  Å.

# Morphological tests with pure anatase nanoparticles

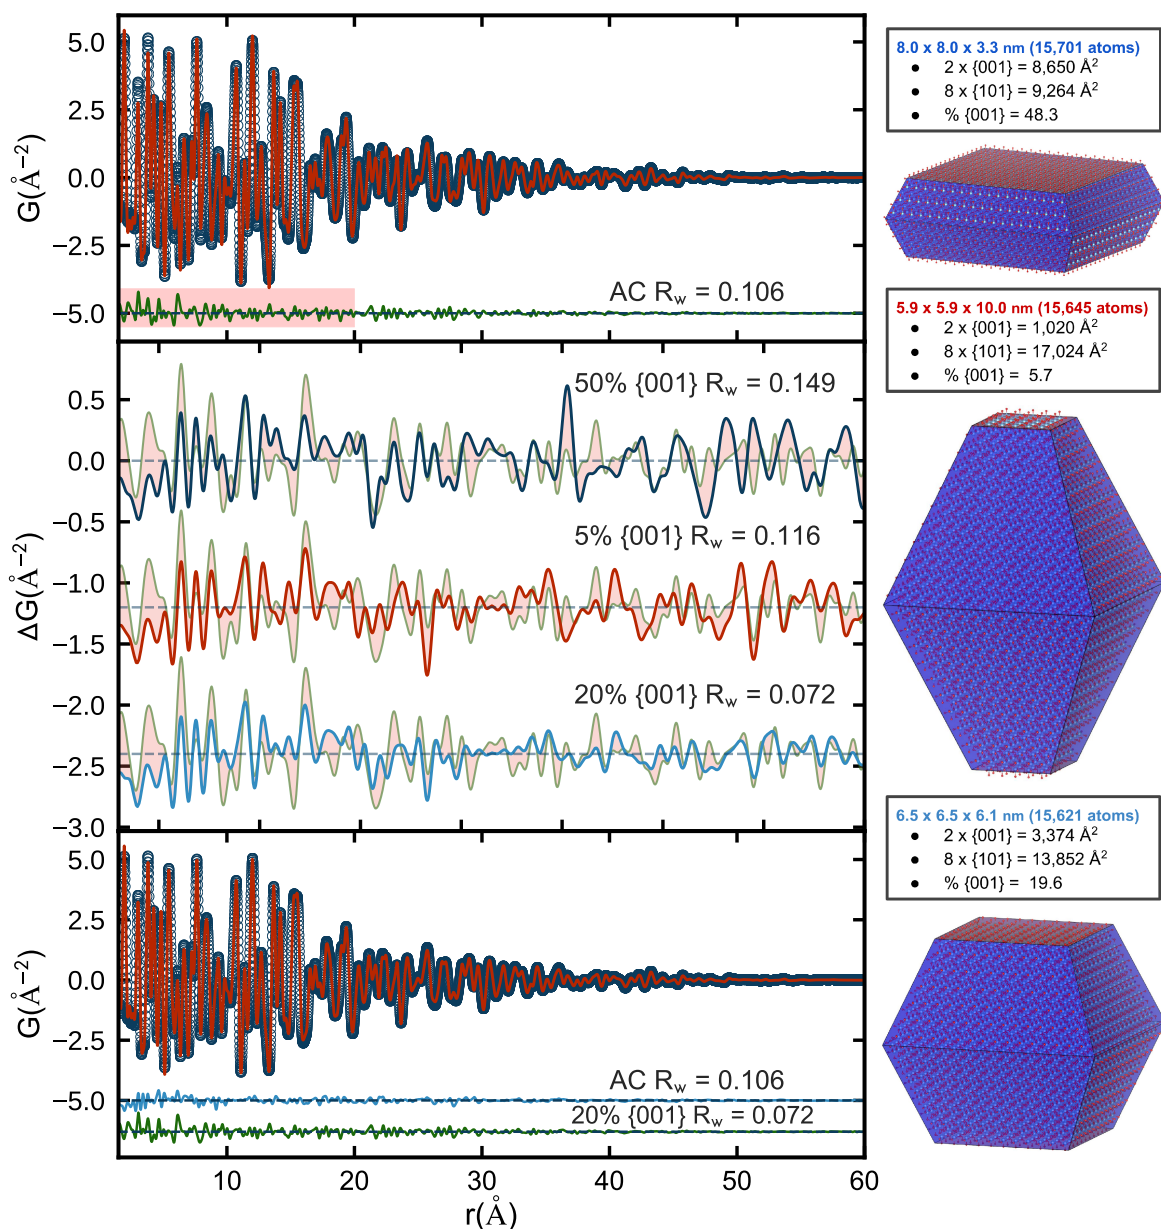

Fig. S3: Top panel: Measured (open circles) and calculated (solid lines) PDFs for pure anatase refined over the full- $r$  range to the mixed phase AC model. Middle panel: difference curves, plotted over a truncated  $r$ -range (highlighted in the top panel) from discrete anatase models with different percentages of  $\{001\}$  surface facets (as labeled) fit to the pure anatase sample. The curves are overlaid with the mixed phase anatase residual in light green.  $R_w$  values are calculated over full- $r$ . Right column: the particle morphologies used in the fits, with descriptions of the facet specific surface areas.  $\{001\}$  surfaces are shown in red and  $\{101\}$  surfaces in blue. Bottom panel: Measured (open circles) and calculated (solid lines) PDFs for pure anatase refined over the full- $r$  range using the best candidate discrete structure (19.6%  $\{001\}$  faceting).



## Supplementary TEM images

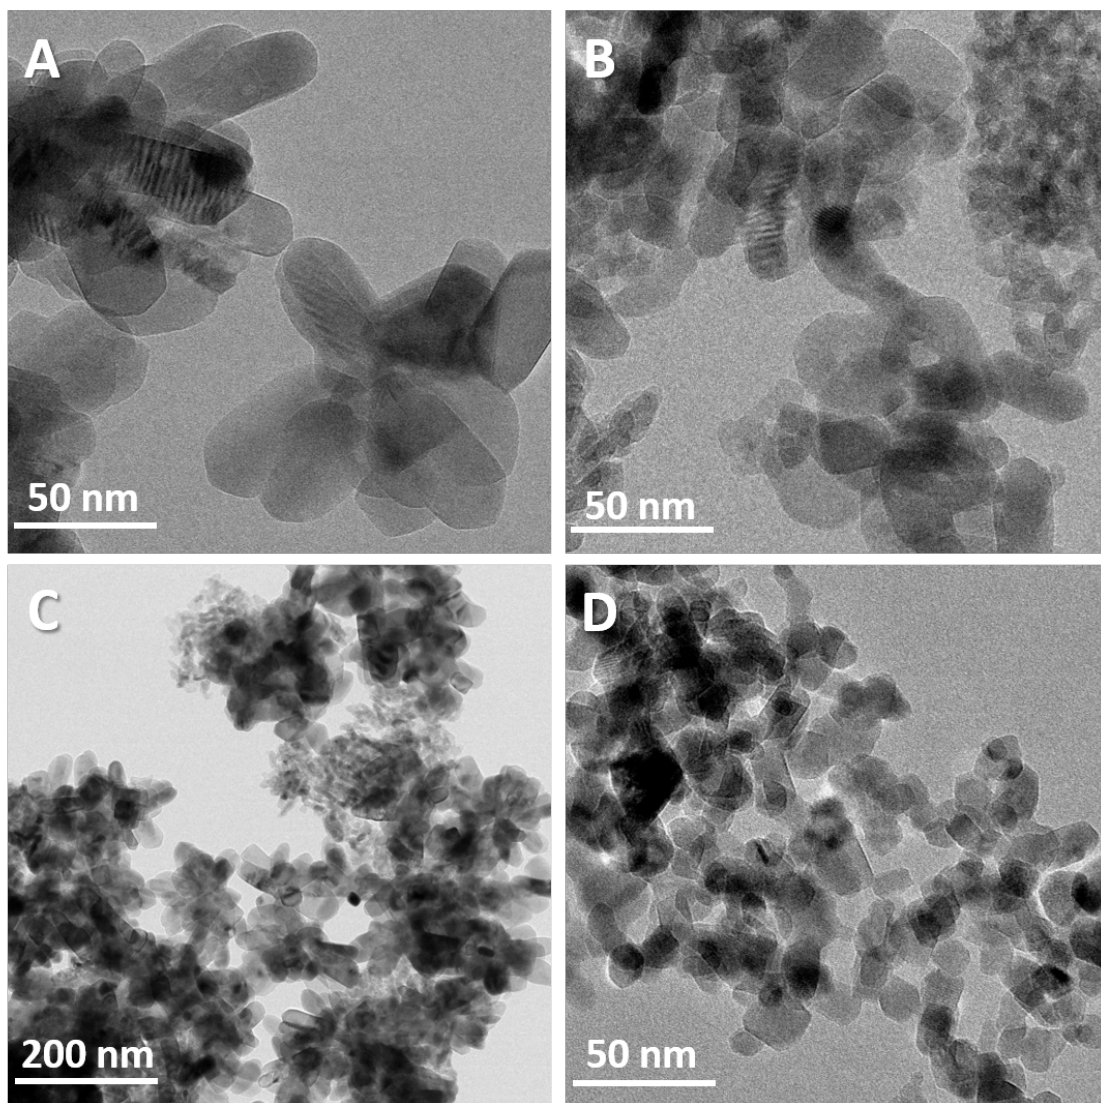

Fig. S4: TEM micrographs of TiO<sub>2</sub> nanoparticles (a) pure rutile (b) pure anatase (c) a physical mixture with 90% anatase and 10% rutile and (d) P90

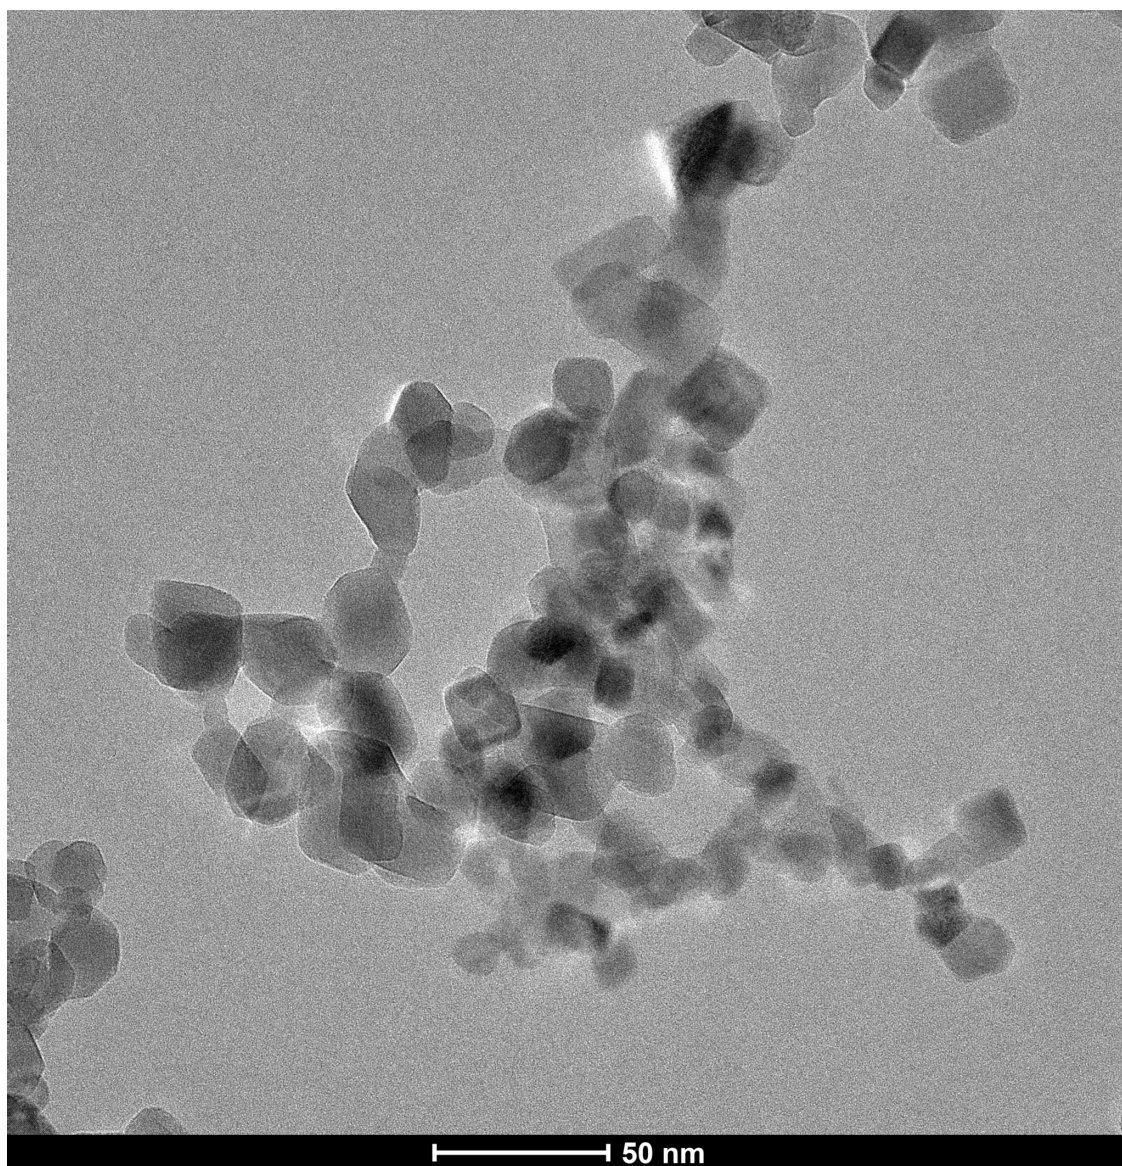

Fig. S5: TEM micrograph of P25

## Reciprocal space data prior to PDF transformation

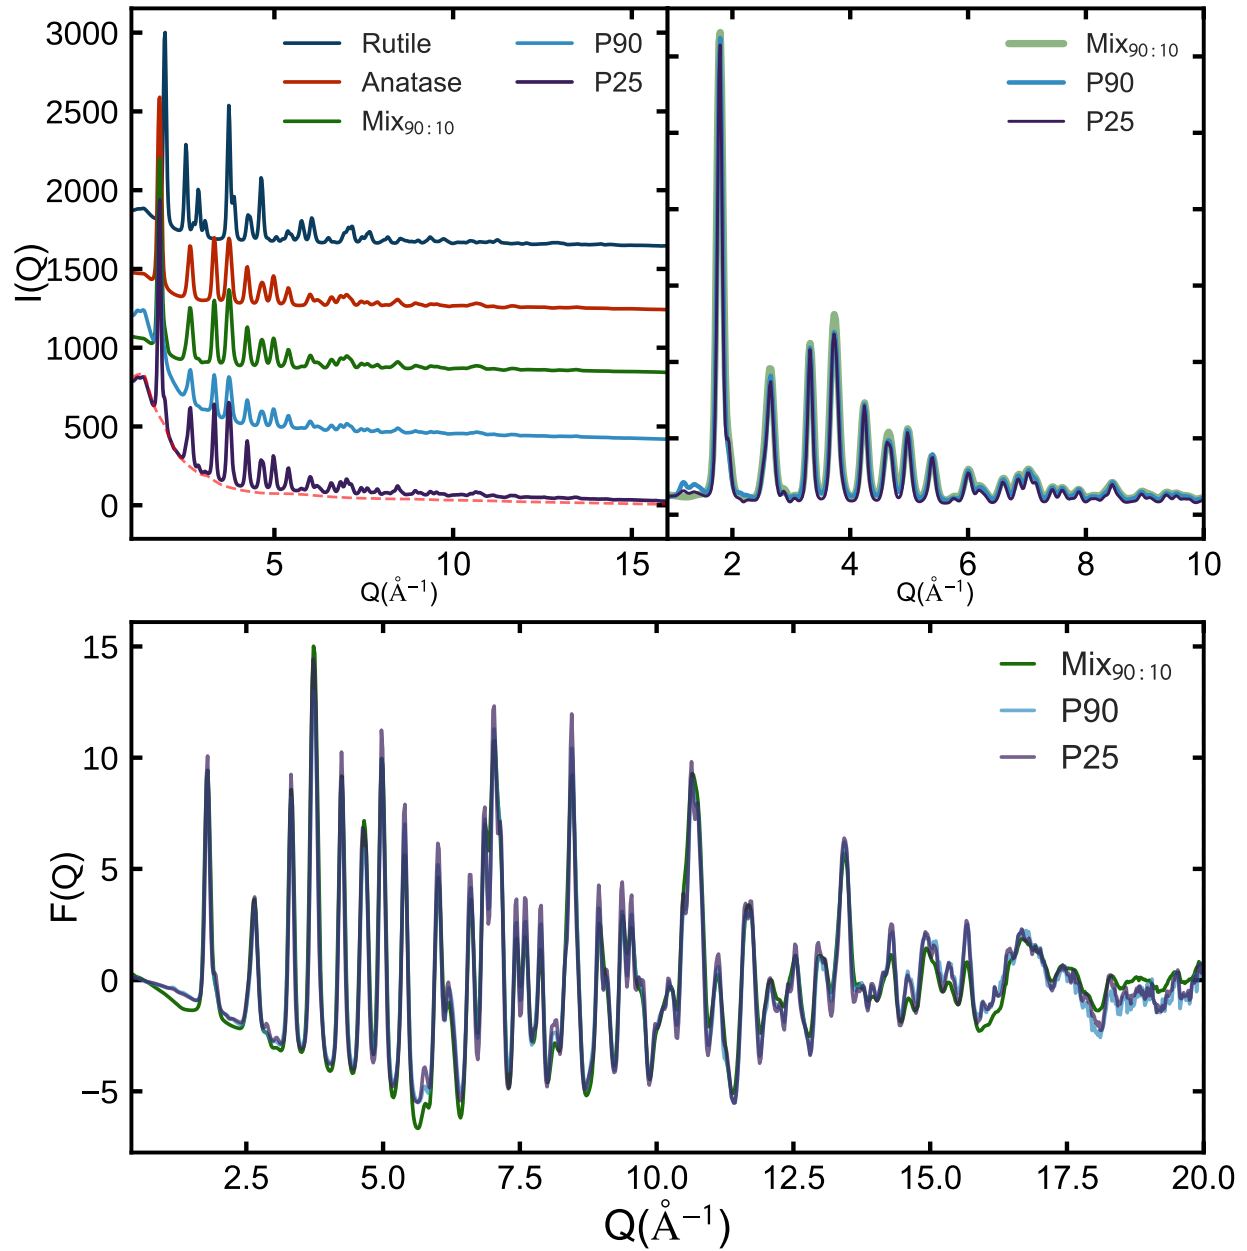

Fig. S6: Top left: Raw integrated diffraction patterns of samples used for PDF analysis, as labeled. Top right: a comparison of background subtracted and scale normalized  $I(Q)$  for mixed  $\text{TiO}_2$  samples. Bottom: an analogous comparison of the phase mixtures after transformation to  $F(Q)$ . See the PDF methods section for details.

## References

1. Horn, M.; Schwerdtfeger, C. F. Refinement of the Structure of Anatase at Several Temperatures. *Z. Für Krist.* **1972**, 9.
2. Baur, W. H.; Khan, A. A. Rutile-Type Compounds. IV.  $\text{SiO}_2$ ,  $\text{GeO}_2$  and a Comparison with Other Rutile-Type Structures. *Acta Crystallogr. B* **1971**, 27, 2133–2139.
